# Supplementary material
Source: publisher site journal article supplement (https://www.dovepress.com/get_supplementary_file.php?f=402090.docx)
Supplement: Supplementary file 1 [file get_supplementary_file.php]

**Addendum 1 (supplementary table)**

**Notes:** Detailed overview of patient characteristics

**Abbreviations:** M: male; F: female; n: amount; FU: follow-up; BCVA: best-corrected visual acuity; PDT: photodynamic therapy; IRF: intraretinal fluid; SRF: subretinal fluid; subRPE: sub retinal pigment epithelium; NA: not applicable; D: decrease; E: equal; R: resolution; I: increase; CST: central subfield thickness; nAMD: neovascular age-related maculadegeneration; NSD: neurosensory decollement; PED: pigment epithelium decollement; PCV: polypoidal choroidal vasculopathy; AE: adverse events; AC: anterior chamber

**Addendum I**. Detailed overview of patient characteristics.

| **Age**  (years) | **Sex**  (M/F) | **Eyes included** (n) | **FU duration** (weeks) | **BCVA** (logMAR) | **BCVA other eye** (logMAR) | **BCVA final FU** (logMAR) | **Eylea**  (n) | **Lucentis** (n) | **Avastin**  (n) | **PDT**  (n) | **Beovu**  (n) | **IRF** | **SRF** | **subRPE** | **CST start** (µm) | **CST final**  (µm) | **Indication** | **AE** | **Result** |
| --- | --- | --- | --- | --- | --- | --- | --- | --- | --- | --- | --- | --- | --- | --- | --- | --- | --- | --- | --- |
| 72 | F | 1 | 46 | 0.3 | 0.1 | 0.1 | 24 | 5 | 0 | 0 | 6 | NA | E | D | 265 | 296 | nAMD, persistent NSD and PED at 4w Eylea | AC inflammation and mild anterior vitritis Cataract NSD recurrence | Resolution inflammation Cataract surgery Restart Eylea |
| 86 | F | 1 | 44 | 0.21 | 0.1 | 0,4 | 44 | 26 | 0 | 0 | 1 | R | NA | NA | 259 | 234 | nAMD, increased edema at 5.5w Eylea | AC inflammation, chemosis, periocular edema, skin rash  Vitritis after 4 weeks | Resolution inflammation and rash  Restart Eylea |
| 77 | F | 1 | 42 | 0.6 | 0.3 | 0.6 | 12 | 0 | 0 | 0 | 1 | NA | D | D | 257 | 332 | nAMD persistent PED and NSD at 4w Eylea | Episode of acute arterial hypertension | Wished to stop brolucizumab  Restart Eylea |
| 66 | F | 1 | 43 | 0.16 | 0.0 | 0 | 63 | 5 | 2 | 4 | 9 | R | NA | D | 189 | 192 | PCV, insufficient response at 3.5w Eylea (0.1ml) | - | Inactive at 7w brolucizumab |
| 78 | M | 1 | 38 | 0.21 | 0.04 | 0.4 | 52 | 17 | 22 | 2 | 5 | NA | D | E | 240 | 272 | nAMD, persistent NSD and PED at 4w Eylea (0.1 ml) | AC inflammation and mild anterior vitritis | Resolution inflammation  Restart Eylea |
| 71 | M | 1 | 29 | 0.3 | -0.07 | 0.4 | 53 | 6 | 2 | 3 | 3 | NA | R | NA | 265 | 205 | nAMD persistent NSD and PED at 4w Eylea (0.1 ml) | Slightly creased lenticular opacities | Inactive at 5w brolucizumab, recurrence at 9w  Switch Eylea due to subjective better vision under Eylea |
| 69 | M | 1 | 39 | 0.3 | 0.16 | 0.3 | 13 | 0 | 0 | 0 | 9 | NA | R | D | 248 | 249 | nAMD persistent NSD at 4w Eylea | - | Inactive at 6w brolucizumab |
| 76 | M | 1 | 40 | 0.21 | 0.16 | 0,1 | 24 | 6 | 0 | 0 | 7 | NA | D | D | 209 | 197 | nAMD, persistent NSD at 4w Lucentis | - | Inactive at 8w brolucizumab |
| 66 | M | 2 | 38 | 0,21 | 0.52 | 0,21  0.52 | 31 | 19 | 0 | 0 | 6  2 | NA  NA | R  R | R  E | 250  189 | 240  187 | nAMD, interval <6w | - | Inactive at 9.5w brolucizumab for both eyes |
| 67 | M | 1 | 32 | 0,6 | 0.04 | 0.4 | 49 | 9 | 0 | 0 | 2 | NA | NA | NA | 213 | 209 | nAMD, interval <6w | AC inflammation | Resolution inflammation  Brolucizumab stop but persistent resolution in NSD (no restart) |
| 77 | F | 1 | 33 | 0,3 | 0.3 | 0.22 | 39 | 8 | 22 | 3 | 7 | NA | NA | NA | 161 | 171 | PCV, interval <6w | - | Inactive at 9w brolucizumab |
| 66 | M | 2 | 34 | 0,3 | 0.6 | 0,3  0.6 | 32 | 0 | 6 | 0 | 6  2 | NA  NA | R  R | D  E | 252  281 | 234  270 | nAMD, senile streaks, increased NSD at 4w Eylea | - | Inactive at 8w brolucizumab for both eyes |
| 82 | M | 1 | 15 | 0,4 | 0.21 | 0,52 | 33 | 6 | 0 | 0 | 3 | E | E | E | 307 | 348 | nAMD, persistent NSD and IRF at 3.5w Eylea (0.1ml) | - | Recurrence at 6w treat and extend, restart Eylea |
| 86 | F | 1 | 29 | 0,4 | 0.1 | 0,21 | 1 | 16 | 0 | 0 | 5 | NA | D | E | 400 | 232 | nAMD persistent NSD at 4w Lucentis | - | Inactive at 8w brolucizumab |
| 65 | M | 1 | 29 | 0,16 | 0.16 | 0 | 18 | 0 | 0 | 0 | 5 | NA | I | NA | 235 | 248 | nAMD, small NSD at 4w Eylea | Mild increase in lenticular opacities with cortical wedge | Better vision despite slight increase in NSD after start  Inactive at 8w brolucizumab |
| 73 | M | 1 | 22 | 1,0 | 0.16 | 0.8 | 26 | 2 | 0 | 0 | 4 | E | I | E | 163 | 163 | nAMD persistent IRF at 5.5w Eylea (0.1ml) | - | Inactive at 10w brolucizumab |
| 74 | F | 1 | 25 | 0,4 | 0.0 | 0,52 | 51 | 0 | 1 | 5 | 5 | NA | R | E | 215 | 196 | PCV, persistent NSD at 5w Eylea | - | Inactive at 8w brolucizumab |
